# Supplementary material
Source: publisher figshare collection journal article supplement (https://acs.figshare.com/ndownloader/files/3778816)
Supplement: Supplementary file 1 [file 3778816]

 
data_L1-H2bbpymah
 
_audit_creation_method            SHELXL-97
_chemical_name_systematic
;
 ?
;
_chemical_name_common             ?
_chemical_melting_point           ?
_chemical_formula_moiety          ?
_chemical_formula_sum
 'C32 H32 N6 O2'
_chemical_formula_weight          532.64
 
loop_
 _atom_type_symbol
 _atom_type_description
 _atom_type_scat_dispersion_real
 _atom_type_scat_dispersion_imag
 _atom_type_scat_source
 'C'  'C'   0.0033   0.0016
 'International Tables Vol C Tables 4.2.6.8 and 6.1.1.4'
 'H'  'H'   0.0000   0.0000
 'International Tables Vol C Tables 4.2.6.8 and 6.1.1.4'
 'N'  'N'   0.0061   0.0033
 'International Tables Vol C Tables 4.2.6.8 and 6.1.1.4'
 'O'  'O'   0.0106   0.0060
 'International Tables Vol C Tables 4.2.6.8 and 6.1.1.4'
 
_symmetry_cell_setting            triclinic
_symmetry_space_group_name_H-M    P-1
 
loop_
 _symmetry_equiv_pos_as_xyz
 'x, y, z'
 '-x, -y, -z'
 
_cell_length_a                    8.5184(5)
_cell_length_b                    8.8638(4)
_cell_length_c                    9.6279(5)
_cell_angle_alpha                 85.629(4)
_cell_angle_beta                  75.918(5)
_cell_angle_gamma                 80.203(4)
_cell_volume                      694.37(6)
_cell_formula_units_Z             1
_cell_measurement_temperature     100
_cell_measurement_reflns_used     6684
_cell_measurement_theta_min       3.1271
_cell_measurement_theta_max       31.0684
 
_exptl_crystal_description        plate
_exptl_crystal_colour             pale-yellow
_exptl_crystal_size_max           0.1693
_exptl_crystal_size_mid           0.1160
_exptl_crystal_size_min           0.0713
_exptl_crystal_density_meas       ?
_exptl_crystal_density_diffrn     1.274
_exptl_crystal_density_method     'not measured'
_exptl_crystal_F_000              282
_exptl_absorpt_coefficient_mu     0.082
_exptl_absorpt_correction_type    'analytical'
_exptl_absorpt_correction_T_min   0.990
_exptl_absorpt_correction_T_max   0.996
_exptl_absorpt_process_details    ?
 
_exptl_special_details
;
 ?
;
 
_diffrn_ambient_temperature       100
_diffrn_radiation_wavelength      0.71073
_diffrn_radiation_type            MoK\a
_diffrn_radiation_source          'fine-focus sealed tube'
_diffrn_radiation_monochromator   graphite
_diffrn_measurement_device_type   'KM4 XCALIBUR2'
_diffrn_measurement_method        ?
_diffrn_detector_area_resol_mean  16.0288
_diffrn_standards_number          ?
_diffrn_standards_interval_count  ?
_diffrn_standards_interval_time   ?
_diffrn_standards_decay_%         ?
_diffrn_reflns_number             15235
_diffrn_reflns_av_R_equivalents   0.0302
_diffrn_reflns_av_sigmaI/netI     0.0403
_diffrn_reflns_limit_h_min        -11
_diffrn_reflns_limit_h_max        11
_diffrn_reflns_limit_k_min        -12
_diffrn_reflns_limit_k_max        12
_diffrn_reflns_limit_l_min        -13
_diffrn_reflns_limit_l_max        13
_diffrn_reflns_theta_min          3.14
_diffrn_reflns_theta_max          31.16
_reflns_number_total              3982
_reflns_number_gt                 2805
_reflns_threshold_expression      >2sigma(I)
 
_computing_data_collection        ?
_computing_cell_refinement        ?
_computing_data_reduction         ?
_computing_structure_solution     ?
_computing_structure_refinement   'SHELXL-97 (Sheldrick, 1997)'
_computing_molecular_graphics     ?
_computing_publication_material   ?
 
_refine_special_details
;
 Refinement of F^2^ against ALL reflections.  The weighted R-factor wR and
 goodness of fit S are based on F^2^, conventional R-factors R are based
 on F, with F set to zero for negative F^2^. The threshold expression of
 F^2^ > 2sigma(F^2^) is used only for calculating R-factors(gt) etc. and is
 not relevant to the choice of reflections for refinement.  R-factors based
 on F^2^ are statistically about twice as large as those based on F, and R-
 factors based on ALL data will be even larger.
;
 
_refine_ls_structure_factor_coef  Fsqd
_refine_ls_matrix_type            full
_refine_ls_weighting_scheme       calc
_refine_ls_weighting_details
 'calc w=1/[\s^2^(Fo^2^)+(0.0606P)^2^+0.0000P] where P=(Fo^2^+2Fc^2^)/3'
_atom_sites_solution_primary      direct
_atom_sites_solution_secondary    difmap
_atom_sites_solution_hydrogens    geom
_refine_ls_hydrogen_treatment     mixed
_refine_ls_extinction_method      none
_refine_ls_extinction_coef        ?
_refine_ls_number_reflns          3982
_refine_ls_number_parameters      181
_refine_ls_number_restraints      0
_refine_ls_R_factor_all           0.0609
_refine_ls_R_factor_gt            0.0404
_refine_ls_wR_factor_ref          0.1074
_refine_ls_wR_factor_gt           0.1031
_refine_ls_goodness_of_fit_ref    1.029
_refine_ls_restrained_S_all       1.029
_refine_ls_shift/su_max           0.000
_refine_ls_shift/su_mean          0.000
 
loop_
 _atom_site_label
 _atom_site_type_symbol
 _atom_site_fract_x
 _atom_site_fract_y
 _atom_site_fract_z
 _atom_site_U_iso_or_equiv
 _atom_site_adp_type
 _atom_site_occupancy
 _atom_site_symmetry_multiplicity
 _atom_site_calc_flag
 _atom_site_refinement_flags
 _atom_site_disorder_assembly
 _atom_site_disorder_group
O1 O 0.19498(9) 0.42977(9) 0.13445(9) 0.0259(2) Uani 1 1 d . . .
H1 H 0.2015 0.3423 0.1694 0.039 Uiso 1 1 calc R . .
N3 N 0.41837(11) 0.29071(10) 0.62910(10) 0.0207(2) Uani 1 1 d . . .
N1 N 0.39589(11) 0.21448(10) 0.28908(9) 0.01636(19) Uani 1 1 d . . .
N2 N 0.11083(12) 0.13587(11) 0.25150(12) 0.0280(2) Uani 1 1 d . . .
C5 C 0.34735(13) 0.07145(12) 0.35731(11) 0.0192(2) Uani 1 1 d . . .
H5A H 0.3167 0.0819 0.4604 0.023 Uiso 1 1 calc R . .
H5B H 0.4406 -0.0098 0.3357 0.023 Uiso 1 1 calc R . .
C2 C 0.36027(13) 0.60493(12) 0.00738(11) 0.0171(2) Uani 1 1 d . . .
H2 H 0.2652 0.6759 0.0128 0.020 Uiso 1 1 calc R . .
C3 C 0.49102(13) 0.35326(11) 0.06516(11) 0.0154(2) Uani 1 1 d . . .
C14 C 0.15342(14) 0.52208(13) 0.62453(13) 0.0234(2) Uani 1 1 d . . .
H14 H 0.0653 0.5997 0.6228 0.028 Uiso 1 1 calc R . .
C4 C 0.48099(13) 0.19772(12) 0.13815(11) 0.0175(2) Uani 1 1 d . . .
H4A H 0.4224 0.1406 0.0912 0.021 Uiso 1 1 calc R . .
H4B H 0.5905 0.1413 0.1311 0.021 Uiso 1 1 calc R . .
C6 C 0.20632(13) 0.02666(12) 0.30944(11) 0.0184(2) Uani 1 1 d . . .
C11 C 0.49193(13) 0.27976(12) 0.36994(11) 0.0179(2) Uani 1 1 d . . .
H11A H 0.5458 0.3587 0.3114 0.021 Uiso 1 1 calc R . .
H11B H 0.5758 0.2004 0.3935 0.021 Uiso 1 1 calc R . .
C12 C 0.38360(12) 0.34728(12) 0.50512(11) 0.0166(2) Uani 1 1 d . . .
C1 C 0.34859(13) 0.46104(12) 0.07197(11) 0.0171(2) Uani 1 1 d . . .
C13 C 0.25255(13) 0.46322(12) 0.49911(12) 0.0205(2) Uani 1 1 d . . .
H13 H 0.2322 0.5005 0.4112 0.025 Uiso 1 1 calc R . .
C7 C 0.17732(15) -0.12342(13) 0.32883(14) 0.0285(3) Uani 1 1 d . . .
H7 H 0.2472 -0.1976 0.3677 0.034 Uiso 1 1 calc R . .
C15 C 0.18744(14) 0.46346(13) 0.75364(13) 0.0239(3) Uani 1 1 d . . .
H15 H 0.1222 0.4998 0.8404 0.029 Uiso 1 1 calc R . .
C8 C 0.04451(17) -0.16212(15) 0.29021(16) 0.0365(3) Uani 1 1 d . . .
H8 H 0.0230 -0.2623 0.3031 0.044 Uiso 1 1 calc R . .
C9 C -0.05628(16) -0.04946(15) 0.23184(15) 0.0324(3) Uani 1 1 d . . .
H9 H -0.1477 -0.0716 0.2055 0.039 Uiso 1 1 calc R . .
C10 C -0.01770(16) 0.09600(15) 0.21384(15) 0.0338(3) Uani 1 1 d . . .
H10 H -0.0846 0.1714 0.1731 0.041 Uiso 1 1 calc R . .
C16 C 0.32054(14) 0.34993(13) 0.74979(12) 0.0238(3) Uani 1 1 d . . .
H16 H 0.3440 0.3120 0.8365 0.029 Uiso 1 1 calc R . .
 
loop_
 _atom_site_aniso_label
 _atom_site_aniso_U_11
 _atom_site_aniso_U_22
 _atom_site_aniso_U_33
 _atom_site_aniso_U_23
 _atom_site_aniso_U_13
 _atom_site_aniso_U_12
O1 0.0143(4) 0.0241(4) 0.0359(5) 0.0109(4) -0.0030(3) -0.0030(3)
N3 0.0247(5) 0.0183(5) 0.0216(5) -0.0012(4) -0.0101(4) -0.0033(4)
N1 0.0186(5) 0.0155(4) 0.0172(4) 0.0021(3) -0.0063(3) -0.0069(3)
N2 0.0269(6) 0.0181(5) 0.0442(6) 0.0030(4) -0.0180(5) -0.0053(4)
C5 0.0221(6) 0.0151(5) 0.0221(5) 0.0033(4) -0.0078(4) -0.0059(4)
C2 0.0153(5) 0.0176(5) 0.0175(5) -0.0005(4) -0.0049(4) 0.0012(4)
C3 0.0171(5) 0.0152(5) 0.0149(5) 0.0003(4) -0.0060(4) -0.0022(4)
C14 0.0168(6) 0.0193(5) 0.0355(6) -0.0029(5) -0.0080(5) -0.0030(4)
C4 0.0170(5) 0.0152(5) 0.0202(5) 0.0000(4) -0.0054(4) -0.0015(4)
C6 0.0188(5) 0.0160(5) 0.0201(5) 0.0005(4) -0.0037(4) -0.0043(4)
C11 0.0161(5) 0.0176(5) 0.0220(5) 0.0025(4) -0.0079(4) -0.0045(4)
C12 0.0166(5) 0.0140(5) 0.0224(5) 0.0013(4) -0.0079(4) -0.0075(4)
C1 0.0146(5) 0.0203(5) 0.0166(5) 0.0010(4) -0.0042(4) -0.0034(4)
C13 0.0195(6) 0.0184(5) 0.0262(6) 0.0031(4) -0.0101(4) -0.0047(4)
C7 0.0309(7) 0.0177(6) 0.0412(7) 0.0056(5) -0.0160(6) -0.0075(5)
C15 0.0214(6) 0.0249(6) 0.0274(6) -0.0083(5) -0.0039(5) -0.0086(5)
C8 0.0394(8) 0.0214(6) 0.0567(9) 0.0070(6) -0.0211(7) -0.0160(5)
C9 0.0259(7) 0.0294(7) 0.0483(8) 0.0014(6) -0.0162(6) -0.0121(5)
C10 0.0284(7) 0.0235(6) 0.0562(9) 0.0037(6) -0.0231(6) -0.0054(5)
C16 0.0294(6) 0.0236(6) 0.0219(6) -0.0015(5) -0.0106(5) -0.0066(5)
 
_geom_special_details
;
 All esds (except the esd in the dihedral angle between two l.s. planes)
 are estimated using the full covariance matrix.  The cell esds are taken
 into account individually in the estimation of esds in distances, angles
 and torsion angles; correlations between esds in cell parameters are only
 used when they are defined by crystal symmetry.  An approximate (isotropic)
 treatment of cell esds is used for estimating esds involving l.s. planes.
;
 
loop_
 _geom_bond_atom_site_label_1
 _geom_bond_atom_site_label_2
 _geom_bond_distance
 _geom_bond_site_symmetry_2
 _geom_bond_publ_flag
O1 C1 1.3659(12) . ?
N3 C16 1.3390(15) . ?
N3 C12 1.3395(13) . ?
N1 C5 1.4592(12) . ?
N1 C4 1.4639(14) . ?
N1 C11 1.4663(13) . ?
N2 C6 1.3343(14) . ?
N2 C10 1.3415(15) . ?
C5 C6 1.5076(15) . ?
C2 C1 1.3840(14) . ?
C2 C3 1.3855(14) 2_665 ?
C3 C2 1.3855(14) 2_665 ?
C3 C1 1.4019(14) . ?
C3 C4 1.5051(14) . ?
C14 C13 1.3760(16) . ?
C14 C15 1.3873(16) . ?
C6 C7 1.3845(15) . ?
C11 C12 1.5000(15) . ?
C12 C13 1.3919(15) . ?
C7 C8 1.3756(17) . ?
C15 C16 1.3772(17) . ?
C8 C9 1.3812(18) . ?
C9 C10 1.3721(17) . ?
 
loop_
 _geom_angle_atom_site_label_1
 _geom_angle_atom_site_label_2
 _geom_angle_atom_site_label_3
 _geom_angle
 _geom_angle_site_symmetry_1
 _geom_angle_site_symmetry_3
 _geom_angle_publ_flag
C16 N3 C12 117.19(9) . . ?
C5 N1 C4 112.48(8) . . ?
C5 N1 C11 111.14(8) . . ?
C4 N1 C11 111.84(8) . . ?
C6 N2 C10 117.55(10) . . ?
N1 C5 C6 113.11(8) . . ?
C1 C2 C3 122.14(9) . 2_665 ?
C2 C3 C1 118.34(9) 2_665 . ?
C2 C3 C4 121.45(9) 2_665 . ?
C1 C3 C4 120.19(9) . . ?
C13 C14 C15 118.71(11) . . ?
N1 C4 C3 109.82(8) . . ?
N2 C6 C7 122.06(10) . . ?
N2 C6 C5 117.99(9) . . ?
C7 C6 C5 119.94(10) . . ?
N1 C11 C12 110.61(8) . . ?
N3 C12 C13 122.46(10) . . ?
N3 C12 C11 117.23(9) . . ?
C13 C12 C11 120.30(9) . . ?
O1 C1 C2 117.14(9) . . ?
O1 C1 C3 123.28(9) . . ?
C2 C1 C3 119.52(9) . . ?
C14 C13 C12 119.34(10) . . ?
C8 C7 C6 119.60(11) . . ?
C16 C15 C14 118.17(11) . . ?
C7 C8 C9 118.77(11) . . ?
C10 C9 C8 118.12(12) . . ?
N2 C10 C9 123.89(12) . . ?
N3 C16 C15 124.13(10) . . ?
 
_diffrn_measured_fraction_theta_max    0.888
_diffrn_reflns_theta_full              30.03
_diffrn_measured_fraction_theta_full   0.967
_refine_diff_density_max    0.357
_refine_diff_density_min   -0.185
_refine_diff_density_rms    0.044
